# Supplementary material
Source: PubMed Central journal article supplement (PMC2896308)
Supplement: NIHMS210629-supplement-Supplement_Figure_1.pdf [file NIHMS210629-supplement-Supplement_Figure_1.pdf]

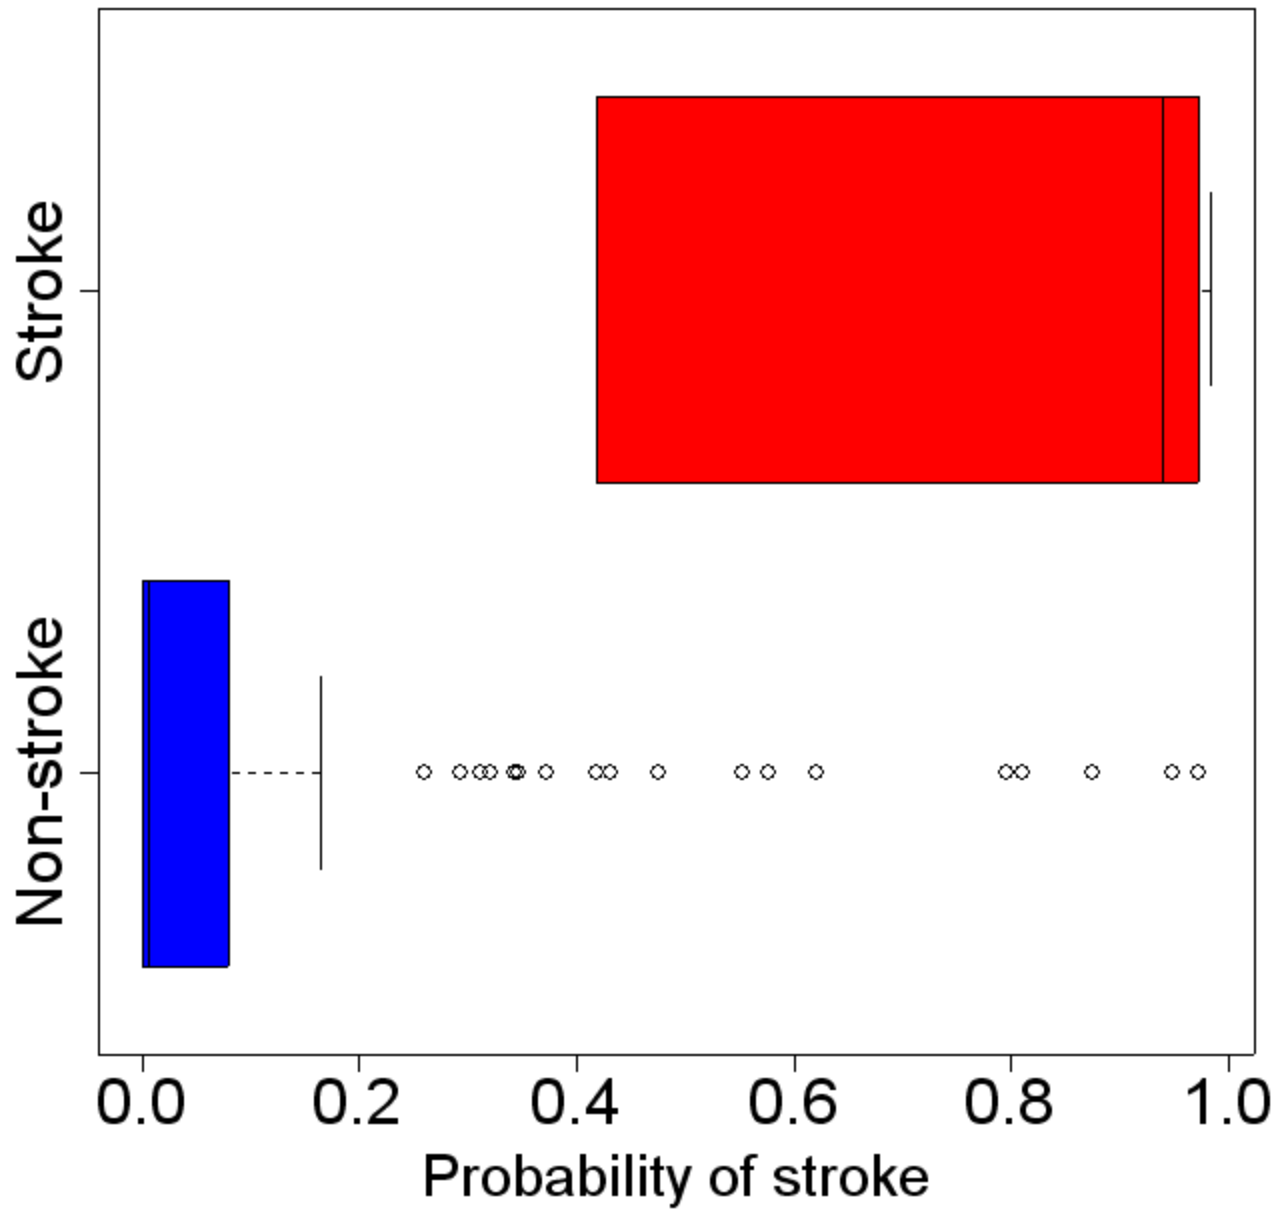

**Supplementary Figure 1:** Box plot of the predictive probability of stroke (risk in 5 years) in an independent set of 7 stroke patients and 107 non-stroke patients obtained through logistic regression. Compared to the predictive probabilities obtained by the BN model plotted in Figure 3, the greater overlapping of the two distributions shows a significantly decreased discriminatory power of the logistic regression model, consistent with its lower predictive accuracy.
