# Supplementary material
Source: PubMed Central journal article supplement (PMC2896308)
Supplement: NIHMS210629-supplement-Supplement_table_1.pdf [file NIHMS210629-supplement-Supplement_table_1.pdf]

**Supplementary Table 1:** Epidemiological statistics of the patient population (1398 subjects) used to induce the dependency network in Figure 2. Values in brackets refers to the independent set of 107 non-stroke patients and 7 stroke patients, and double dashes denote data not available. HbF.G: HbF g/dL; HbF.P: HbF percent; HbG: total hemoglobin concentration;  $\alpha$  thalassemia: heterozygosity or homozygosity for  $-3.7$  kb  $\alpha$  thalassemia deletion. Age refers to the beginning of the study, and the age of the stroke patients in the independent population is the age at the event.

|                      | Stroke    |               |             | Non-stroke |             |             |
|----------------------|-----------|---------------|-------------|------------|-------------|-------------|
|                      | Percent   | Mean          | StE         | Percent    | Mean        | StE         |
| Male                 | 46% (57%) |               |             | 44% (54%)  |             |             |
| $\alpha$ thalassemia | 22% (--)  |               |             | 29% (29%)  |             |             |
| HbG                  |           | 8.37 (--)     | 0.16 (--)   |            | 8.42 (8.38) | 0.04 (0.13) |
| HbF.P                |           | 6.30 (1.18)   | 0.94 (1.25) |            | 7.88 (9.31) | 0.24 (1.99) |
| HbF.G                |           | 0.45 (0.95)   | 0.06 (0.69) |            | 0.69 (0.79) | 0.02 (0.18) |
| Age                  |           | 22.46 (12.88) | 1.44 (4.00) |            | 21.9 (22.4) | 0.34 (1.29) |
