# Supplementary material
Source: PubMed Central journal article supplement (PMC2896308)
Supplement: NIHMS210629-supplement-Supplement_Table_2.pdf [file NIHMS210629-supplement-Supplement_Table_2.pdf]

**Supplementary Table 2:** Conditional probability distributions quantifying the network in Figure 2. These network parameters were estimated from the data obtained from the original cohort study, as described in the Methods section. Each table contains the conditional probability distributions of each node in the network (reported on the last three columns) given the combination of its parents in the network. For example, the first table reports the conditional probability distributions over the genotypes of the SNP TGFNR3.9 given its parents in the network TGFBR3.8, TGFBR3.10 and TGFBR3.2.

| TGFBR3.8 | TGFBR3.10 | TGFBR3.2 | TGFBR3.9 |       |       |
|----------|-----------|----------|----------|-------|-------|
|          |           |          | TT       | CC    | CT    |
| TT       | TT        | TT       | 0.333    | 0.333 | 0.333 |
| TT       | TT        | CC       | 0.333    | 0.333 | 0.333 |
| TT       | TT        | CT       | 0.333    | 0.333 | 0.333 |
| TT       | CT        | TT       | 0.333    | 0.333 | 0.333 |
| TT       | CT        | CC       | 0.076    | 0.076 | 0.848 |
| TT       | CT        | CT       | 0.333    | 0.333 | 0.333 |
| TT       | CC        | TT       | 0.333    | 0.333 | 0.333 |
| TT       | CC        | CC       | 0.052    | 0.896 | 0.052 |
| TT       | CC        | CT       | 0.076    | 0.848 | 0.076 |
| CT       | TT        | TT       | 0.333    | 0.333 | 0.333 |
| CT       | TT        | CC       | 0.333    | 0.333 | 0.333 |
| CT       | TT        | CT       | 0.333    | 0.333 | 0.333 |
| CT       | CT        | TT       | 0.333    | 0.333 | 0.333 |
| CT       | CT        | CC       | 0.042    | 0.042 | 0.916 |
| CT       | CT        | CT       | 0.043    | 0.043 | 0.914 |
| CT       | CC        | TT       | 0.333    | 0.333 | 0.333 |
| CT       | CC        | CC       | 0.007    | 0.666 | 0.327 |
| CT       | CC        | CT       | 0.013    | 0.171 | 0.816 |
| CC       | TT        | TT       | 0.333    | 0.333 | 0.333 |
| CC       | TT        | CC       | 0.927    | 0.006 | 0.067 |
| CC       | TT        | CT       | 0.848    | 0.076 | 0.076 |
| CC       | CT        | TT       | 0.076    | 0.076 | 0.848 |
| CC       | CT        | CC       | 0.266    | 0.009 | 0.725 |
| CC       | CT        | CT       | 0.827    | 0.001 | 0.172 |
| CC       | CC        | TT       | 0.861    | 0.017 | 0.122 |
| CC       | CC        | CC       | 0.171    | 0.354 | 0.475 |
| CC       | CC        | CT       | 0.261    | 0.059 | 0.68  |

| SELP.11 | SELP.2 |       |       |
|---------|--------|-------|-------|
|         | CC     | TT    | CT    |
| TT      | 0.105  | 0.655 | 0.24  |
| AA      | 0.577  | 0.16  | 0.263 |
| AT      | 0.116  | 0.175 | 0.709 |

| TGFBR3.10 | TGFBR3.8 | TGFBR3.2 |       |       |
|-----------|----------|----------|-------|-------|
|           |          | TT       | CC    | CT    |
| TT        | TT       | 0.333    | 0.333 | 0.333 |
| TT        | CT       | 0.333    | 0.333 | 0.333 |
| TT        | CC       | 0.017    | 0.911 | 0.072 |
| CT        | TT       | 0.157    | 0.686 | 0.157 |

|    |    |       |       |       |
|----|----|-------|-------|-------|
| CT | CT | 0.01  | 0.911 | 0.079 |
| CT | CC | 0.006 | 0.642 | 0.352 |
| CC | TT | 0.013 | 0.93  | 0.057 |
| CC | CT | 0.013 | 0.659 | 0.328 |
| CC | CC | 0.075 | 0.538 | 0.387 |

| SELP.12 | SELP.13 | SELP.11 |       |       |
|---------|---------|---------|-------|-------|
|         |         | TT      | AA    | AT    |
| TT      | AA      | 0.624   | 0.043 | 0.333 |
| TT      | TT      | 0.105   | 0.836 | 0.059 |
| TT      | AT      | 0.103   | 0.103 | 0.794 |
| AT      | AA      | 0.648   | 0.145 | 0.207 |
| AT      | TT      | 0.023   | 0.704 | 0.273 |
| AT      | AT      | 0.06    | 0.105 | 0.835 |
| AA      | AA      | 0.737   | 0.038 | 0.225 |
| AA      | TT      | 0.18    | 0.461 | 0.359 |
| AA      | AT      | 0.225   | 0.098 | 0.677 |

| SELP.13 | SELP  |       |       |
|---------|-------|-------|-------|
|         | AA    | GG    | AG    |
| AA      | 0.36  | 0.176 | 0.464 |
| TT      | 0.205 | 0.332 | 0.463 |
| AT      | 0.277 | 0.226 | 0.497 |

| STROKE | TGFBR3.10 | TGFBR3.8 |       |       |
|--------|-----------|----------|-------|-------|
|        |           | TT       | CT    | CC    |
| 0      | TT        | 0.024    | 0.024 | 0.952 |
| 0      | CT        | 0.006    | 0.12  | 0.874 |
| 0      | CC        | 0.019    | 0.226 | 0.755 |
| 1      | TT        | 0.333    | 0.333 | 0.333 |
| 1      | CT        | 0.19     | 0.62  | 0.19  |
| 1      | CC        | 0.026    | 0.113 | 0.861 |

| SELP.12 | SELPLG |       |       |
|---------|--------|-------|-------|
|         | AA     | GG    | AG    |
| TT      | 0.218  | 0.439 | 0.344 |
| AT      | 0.029  | 0.657 | 0.314 |
| AA      | 0.029  | 0.712 | 0.259 |

| SELP.12 | SELP.13 |       |       |
|---------|---------|-------|-------|
|         | AA      | TT    | AT    |
| TT      | 0.218   | 0.691 | 0.091 |
| AT      | 0.059   | 0.369 | 0.572 |
| AA      | 0.319   | 0.168 | 0.513 |

| ANXA2.12 | ANXA2.13 | ANXA2.7 | ANXA2.11 |       |       |
|----------|----------|---------|----------|-------|-------|
|          |          |         | AA       | AG    | GG    |
| GG       | AA       | GG      | 0.333    | 0.333 | 0.333 |
| GG       | AA       | GT      | 0.333    | 0.333 | 0.333 |
| GG       | AA       | TT      | 0.333    | 0.333 | 0.333 |
| GG       | AG       | GG      | 0.333    | 0.333 | 0.333 |

|    |    |    |       |       |       |
|----|----|----|-------|-------|-------|
| GG | AG | GT | 0.333 | 0.333 | 0.333 |
| GG | AG | TT | 0.333 | 0.333 | 0.333 |
| GG | GG | GG | 0.333 | 0.333 | 0.333 |
| GG | GG | GT | 0.076 | 0.848 | 0.076 |
| GG | GG | TT | 0.006 | 0.067 | 0.927 |
| CC | AA | GG | 0.333 | 0.333 | 0.333 |
| CC | AA | GT | 0.03  | 0.333 | 0.637 |
| CC | AA | TT | 0.002 | 0.021 | 0.977 |
| CC | AG | GG | 0.175 | 0.333 | 0.492 |
| CC | AG | GT | 0.02  | 0.861 | 0.119 |
| CC | AG | TT | 0.032 | 0.362 | 0.606 |
| CC | GG | GG | 0.887 | 0.087 | 0.026 |
| CC | GG | GT | 0.307 | 0.613 | 0.08  |
| CC | GG | TT | 0.2   | 0.41  | 0.39  |
| CG | AA | GG | 0.333 | 0.333 | 0.333 |
| CG | AA | GT | 0.333 | 0.333 | 0.333 |
| CG | AA | TT | 0.333 | 0.333 | 0.333 |
| CG | AG | GG | 0.848 | 0.076 | 0.076 |
| CG | AG | GT | 0.012 | 0.494 | 0.494 |
| CG | AG | TT | 0.002 | 0.051 | 0.947 |
| CG | GG | GG | 0.043 | 0.043 | 0.914 |
| CG | GG | GT | 0.032 | 0.853 | 0.115 |
| CG | GG | TT | 0.013 | 0.356 | 0.631 |

| BMP6.13 | BMP6.10 | BMP6.11 | BMP6.9 |       |       |
|---------|---------|---------|--------|-------|-------|
|         |         |         | TT     | CC    | CT    |
| TT      | AA      | CC      | 0.992  | 0.004 | 0.004 |
| TT      | AA      | TT      | 0.076  | 0.076 | 0.848 |
| TT      | AA      | CT      | 0.03   | 0.03  | 0.94  |
| TT      | AT      | CC      | 0.776  | 0.007 | 0.217 |
| TT      | AT      | TT      | 0.023  | 0.489 | 0.489 |
| TT      | AT      | CT      | 0.124  | 0.063 | 0.813 |
| TT      | TT      | CC      | 0.883  | 0.077 | 0.04  |
| TT      | TT      | TT      | 0.08   | 0.688 | 0.232 |
| TT      | TT      | CT      | 0.067  | 0.24  | 0.693 |
| CC      | AA      | CC      | 0.651  | 0.016 | 0.333 |
| CC      | AA      | TT      | 0.076  | 0.848 | 0.076 |
| CC      | AA      | CT      | 0.043  | 0.478 | 0.478 |
| CC      | AT      | CC      | 0.301  | 0.107 | 0.592 |
| CC      | AT      | TT      | 0.014  | 0.835 | 0.151 |
| CC      | AT      | CT      | 0.014  | 0.127 | 0.859 |
| CC      | TT      | CC      | 0.164  | 0.626 | 0.21  |
| CC      | TT      | TT      | 0.01   | 0.957 | 0.033 |
| CC      | TT      | CT      | 0.032  | 0.658 | 0.31  |
| CT      | AA      | CC      | 0.478  | 0.004 | 0.518 |
| CT      | AA      | TT      | 0.03   | 0.637 | 0.333 |
| CT      | AA      | CT      | 0.207  | 0.019 | 0.774 |
| CT      | AT      | CC      | 0.238  | 0.107 | 0.655 |
| CT      | AT      | TT      | 0.008  | 0.252 | 0.74  |
| CT      | AT      | CT      | 0.006  | 0.056 | 0.938 |
| CT      | TT      | CC      | 0.439  | 0.202 | 0.36  |

|    |    |    |      |       |       |
|----|----|----|------|-------|-------|
| CT | TT | TT | 0    | 0.849 | 0.151 |
| CT | TT | CT | 0.02 | 0.387 | 0.593 |

| BMP6.13 | STROKE | BMP6.14 | BMP6.12 |       |       |
|---------|--------|---------|---------|-------|-------|
|         |        |         | TT      | CT    | CC    |
| TT      |        | 0 AA    | 0.103   | 0.794 | 0.103 |
| TT      |        | 0 AC    | 0.02    | 0.423 | 0.557 |
| TT      |        | 0 CC    | 0.038   | 0.122 | 0.84  |
| TT      |        | 1 AA    | 0.333   | 0.333 | 0.333 |
| TT      |        | 1 AC    | 0.103   | 0.103 | 0.794 |
| TT      |        | 1 CC    | 0.013   | 0.013 | 0.974 |
| CC      |        | 0 AA    | 0.672   | 0.237 | 0.091 |
| CC      |        | 0 AC    | 0.351   | 0.556 | 0.093 |
| CC      |        | 0 CC    | 0.181   | 0.37  | 0.449 |
| CC      |        | 1 AA    | 0.043   | 0.333 | 0.624 |
| CC      |        | 1 AC    | 0.01    | 0.139 | 0.851 |
| CC      |        | 1 CC    | 0.003   | 0.037 | 0.96  |
| CT      |        | 0 AA    | 0.395   | 0.211 | 0.395 |
| CT      |        | 0 AC    | 0.078   | 0.779 | 0.143 |
| CT      |        | 0 CC    | 0.049   | 0.344 | 0.607 |
| CT      |        | 1 AA    | 0.333   | 0.333 | 0.333 |
| CT      |        | 1 AC    | 0.103   | 0.103 | 0.794 |
| CT      |        | 1 CC    | 0.043   | 0.043 | 0.914 |

| STROKE | CSF2.3 | CSF2.4 |       |       |
|--------|--------|--------|-------|-------|
|        |        | CC     | CT    | TT    |
|        | 0 TT   | 0.966  | 0.008 | 0.026 |
|        | 0 CT   | 0.075  | 0.846 | 0.079 |
|        | 0 CC   | 0.022  | 0.236 | 0.742 |
|        | 1 TT   | 0.86   | 0.07  | 0.07  |
|        | 1 CT   | 0.382  | 0.492 | 0.126 |
|        | 1 CC   | 0.087  | 0.152 | 0.761 |

| ANXA2.4 | ANXA2.3 |       |       |
|---------|---------|-------|-------|
|         | AA      | AT    | TT    |
| AA      | 0.061   | 0.257 | 0.682 |
| GG      | 0.272   | 0.47  | 0.258 |
| AG      | 0.098   | 0.512 | 0.39  |

| ANXA2.12 | ANXA2.7 | ANXA2.5 |       |       |
|----------|---------|---------|-------|-------|
|          |         | AA      | TT    | AT    |
| GG       | GG      | 0.333   | 0.333 | 0.333 |
| GG       | GT      | 0.157   | 0.686 | 0.157 |
| GG       | TT      | 0.018   | 0.373 | 0.609 |
| CC       | GG      | 0.049   | 0.731 | 0.22  |
| CC       | GT      | 0.079   | 0.483 | 0.437 |
| CC       | TT      | 0.21    | 0.305 | 0.486 |
| CG       | GG      | 0.076   | 0.591 | 0.333 |
| CG       | GT      | 0.07    | 0.708 | 0.222 |
| CG       | TT      | 0.087   | 0.49  | 0.422 |

| TGFBR3.7 |  | STROKE | TGFBR3.10 |       |       |
|----------|--|--------|-----------|-------|-------|
|          |  |        | TT        | CT    | CC    |
| TT       |  | 0      | 0.115     | 0.208 | 0.677 |
| TT       |  | 1      | 0.19      | 0.19  | 0.62  |
| CC       |  | 0      | 0.009     | 0.163 | 0.828 |
| CC       |  | 1      | 0.005     | 0.016 | 0.979 |
| CT       |  | 0      | 0.03      | 0.241 | 0.729 |
| CT       |  | 1      | 0.333     | 0.333 | 0.333 |

| MET.6 |  | STROKE | SELP.12 |       |       |
|-------|--|--------|---------|-------|-------|
|       |  |        | TT      | AT    | AA    |
| TT    |  | 0      | 0.12    | 0.268 | 0.612 |
| TT    |  | 1      | 0.333   | 0.333 | 0.333 |
| CT    |  | 0      | 0.033   | 0.243 | 0.724 |
| CT    |  | 1      | 0.228   | 0.07  | 0.702 |
| CC    |  | 0      | 0.009   | 0.195 | 0.796 |
| CC    |  | 1      | 0.107   | 0.005 | 0.888 |

| MET.6 |  | MET.9 |       |       |
|-------|--|-------|-------|-------|
|       |  | AA    | AT    | TT    |
| TT    |  | 0.503 | 0.318 | 0.179 |
| CT    |  | 0.027 | 0.515 | 0.458 |
| CC    |  | 0.012 | 0.15  | 0.838 |

| TGFBR3.7 |  | TGFBR3 |       |       |
|----------|--|--------|-------|-------|
|          |  | AA     | GG    | AG    |
| TT       |  | 0.333  | 0.587 | 0.08  |
| CC       |  | 0.016  | 0.763 | 0.221 |
| CT       |  | 0.065  | 0.456 | 0.478 |

| TGFBR3.7 |  | CSF2.3 |       |       |
|----------|--|--------|-------|-------|
|          |  | TT     | CT    | CC    |
| TT       |  | 0.122  | 0.249 | 0.629 |
| CC       |  | 0.042  | 0.361 | 0.597 |
| CT       |  | 0.049  | 0.495 | 0.456 |

| ANXA2.12 |    | ANXA2.13 |  | ANXA2.7 |       |       |
|----------|----|----------|--|---------|-------|-------|
|          |    |          |  | GG      | GT    | TT    |
| GG       | AA |          |  | 0.333   | 0.333 | 0.333 |
| GG       | AG |          |  | 0.333   | 0.333 | 0.333 |
| GG       | GG |          |  | 0.017   | 0.072 | 0.911 |
| CC       | AA |          |  | 0.005   | 0.059 | 0.936 |
| CC       | AG |          |  | 0.018   | 0.439 | 0.543 |
| CC       | GG |          |  | 0.124   | 0.424 | 0.452 |
| CG       | AA |          |  | 0.333   | 0.333 | 0.333 |
| CG       | AG |          |  | 0.019   | 0.119 | 0.862 |
| CG       | GG |          |  | 0.009   | 0.372 | 0.619 |

| KL.2 |  | KL.3  |       |       |
|------|--|-------|-------|-------|
|      |  | TT    | AT    | AA    |
| TT   |  | 0.061 | 0.061 | 0.878 |

|    |       |      |       |
|----|-------|------|-------|
| CT | 0.017 | 0.32 | 0.663 |
| CC | 0.111 | 0.39 | 0.498 |

| ANXA2.13 | ANXA2.4 |       |       |
|----------|---------|-------|-------|
|          | AA      | GG    | AG    |
| AA       | 0.692   | 0.067 | 0.241 |
| AG       | 0.371   | 0.098 | 0.531 |
| GG       | 0.25    | 0.251 | 0.498 |

| BMP6.10 | STROKE | BMP6.14 | BMP6.13 |       |       |
|---------|--------|---------|---------|-------|-------|
|         |        |         | TT      | CC    | CT    |
| AA      | 0      | AA      | 0.794   | 0.103 | 0.103 |
| AA      | 0      | AC      | 0.1     | 0.362 | 0.538 |
| AA      | 0      | CC      | 0.438   | 0.09  | 0.473 |
| AA      | 1      | AA      | 0.333   | 0.333 | 0.333 |
| AA      | 1      | AC      | 0.333   | 0.333 | 0.333 |
| AA      | 1      | CC      | 0.333   | 0.333 | 0.333 |
| AT      | 0      | AA      | 0.02    | 0.691 | 0.289 |
| AT      | 0      | AC      | 0.001   | 0.372 | 0.627 |
| AT      | 0      | CC      | 0.26    | 0.166 | 0.574 |
| AT      | 1      | AA      | 0.333   | 0.333 | 0.333 |
| AT      | 1      | AC      | 0.333   | 0.333 | 0.333 |
| AT      | 1      | CC      | 0.333   | 0.333 | 0.333 |
| TT      | 0      | AA      | 0.005   | 0.898 | 0.097 |
| TT      | 0      | AC      | 0.026   | 0.556 | 0.418 |
| TT      | 0      | CC      | 0.15    | 0.333 | 0.517 |
| TT      | 1      | AA      | 0.043   | 0.914 | 0.043 |
| TT      | 1      | AC      | 0.066   | 0.868 | 0.066 |
| TT      | 1      | CC      | 0.154   | 0.803 | 0.043 |

| SELP.17 | STROKE | SELP.22 |       |       |
|---------|--------|---------|-------|-------|
|         |        | CC      | CT    | TT    |
| TT      | 0      | 0.199   | 0.199 | 0.602 |
| TT      | 1      | 0.333   | 0.333 | 0.333 |
| CC      | 0      | 0.354   | 0.492 | 0.155 |
| CC      | 1      | 0.986   | 0.007 | 0.007 |
| CT      | 0      | 0.099   | 0.528 | 0.373 |
| CT      | 1      | 0.97    | 0.015 | 0.015 |

| EDN1.3 | EDN1.6 | EDN1.10 | EDN1.7 |       |       |
|--------|--------|---------|--------|-------|-------|
|        |        |         | CC     | TT    | CT    |
| AA     | CT     | AA      | 0.333  | 0.333 | 0.333 |
| AA     | CT     | CC      | 0.333  | 0.333 | 0.333 |
| AA     | CT     | AC      | 0.333  | 0.333 | 0.333 |
| AA     | TT     | AA      | 0.333  | 0.333 | 0.333 |
| AA     | TT     | CC      | 0.333  | 0.333 | 0.333 |
| AA     | TT     | AC      | 0.333  | 0.333 | 0.333 |
| AA     | CC     | AA      | 0.333  | 0.333 | 0.333 |
| AA     | CC     | CC      | 0.883  | 0.01  | 0.107 |
| AA     | CC     | AC      | 0.848  | 0.076 | 0.076 |
| AC     | CT     | AA      | 0.333  | 0.333 | 0.333 |

|    |    |    |       |       |       |
|----|----|----|-------|-------|-------|
| AC | CT | CC | 0.664 | 0.036 | 0.3   |
| AC | CT | AC | 0.914 | 0.043 | 0.043 |
| AC | TT | AA | 0.333 | 0.333 | 0.333 |
| AC | TT | CC | 0.914 | 0.043 | 0.043 |
| AC | TT | AC | 0.333 | 0.333 | 0.333 |
| AC | CC | AA | 0.962 | 0.019 | 0.019 |
| AC | CC | CC | 0.376 | 0.031 | 0.593 |
| AC | CC | AC | 0.786 | 0.002 | 0.212 |
| CC | CT | AA | 0.333 | 0.333 | 0.333 |
| CC | CT | CC | 0.339 | 0.001 | 0.66  |
| CC | CT | AC | 0.914 | 0.015 | 0.071 |
| CC | TT | AA | 0.333 | 0.333 | 0.333 |
| CC | TT | CC | 0.963 | 0.003 | 0.034 |
| CC | TT | AC | 0.848 | 0.076 | 0.076 |
| CC | CC | AA | 0.821 | 0.021 | 0.158 |
| CC | CC | CC | 0.144 | 0.377 | 0.479 |
| CC | CC | AC | 0.325 | 0.036 | 0.639 |

| MET.6 | NRCAM |       |       |
|-------|-------|-------|-------|
|       | CG    | CC    | GG    |
| TT    | 0.549 | 0.41  | 0.041 |
| CT    | 0.508 | 0.223 | 0.269 |
| CC    | 0.456 | 0.185 | 0.359 |

| SELP.17 | SELP.15 |       |       |
|---------|---------|-------|-------|
|         | TT      | CC    | CT    |
| TT      | 0.038   | 0.84  | 0.122 |
| CC      | 0.129   | 0.412 | 0.46  |
| CT      | 0.015   | 0.598 | 0.387 |

| MET.5 | KL.2  |       |       |
|-------|-------|-------|-------|
|       | TT    | CT    | CC    |
| TT    | 0.103 | 0.449 | 0.449 |
| CT    | 0.026 | 0.163 | 0.811 |
| CC    | 0.008 | 0.116 | 0.876 |

| MET.5 | TGFB2 |       |       |
|-------|-------|-------|-------|
|       | GG    | CG    | CC    |
| TT    | 0.103 | 0.218 | 0.679 |
| CT    | 0.026 | 0.209 | 0.765 |
| CC    | 0.005 | 0.119 | 0.876 |

| MET.5 | STROKE | TGFB3.7 |       |       |
|-------|--------|---------|-------|-------|
|       |        | TT      | CC    | CT    |
| TT    | 0      | 0.061   | 0.47  | 0.47  |
| TT    | 1      | 0.333   | 0.333 | 0.333 |
| CT    | 0      | 0.013   | 0.769 | 0.218 |
| CT    | 1      | 0.19    | 0.62  | 0.19  |
| CC    | 0      | 0.016   | 0.856 | 0.128 |
| CC    | 1      | 0.016   | 0.979 | 0.005 |

| MET.5  |   | SELP.14 |       |       |
|--------|---|---------|-------|-------|
| STROKE |   | TT      | CC    | CT    |
| TT     | 0 | 0.061   | 0.606 | 0.333 |
| TT     | 1 | 0.333   | 0.333 | 0.333 |
| CT     | 0 | 0.023   | 0.908 | 0.069 |
| CT     | 1 | 0.62    | 0.19  | 0.19  |
| CC     | 0 | 0.002   | 0.851 | 0.147 |
| CC     | 1 | 0.286   | 0.406 | 0.308 |

| STROKE |    | MET.6 |       |       |
|--------|----|-------|-------|-------|
| MET.5  |    | TT    | CT    | CC    |
| 0      | TT | 0.606 | 0.333 | 0.061 |
| 0      | CT | 0.051 | 0.656 | 0.293 |
| 0      | CC | 0.009 | 0.151 | 0.84  |
| 1      | TT | 0.333 | 0.333 | 0.333 |
| 1      | CT | 0.19  | 0.62  | 0.19  |
| 1      | CC | 0.005 | 0.048 | 0.947 |

| ECE1.13 |  | SELP.17 |       |       |
|---------|--|---------|-------|-------|
|         |  | TT      | CC    | CT    |
| TT      |  | 0.195   | 0.195 | 0.61  |
| CT      |  | 0.014   | 0.76  | 0.226 |
| CC      |  | 0.016   | 0.754 | 0.23  |

| MET.5 |  | CIQB  |       |       |
|-------|--|-------|-------|-------|
|       |  | TT    | CT    | CC    |
| TT    |  | 0.103 | 0.449 | 0.449 |
| CT    |  | 0.108 | 0.218 | 0.674 |
| CC    |  | 0.019 | 0.259 | 0.722 |

| EDN1.9 |  | BMP6.14 |       |       |
|--------|--|---------|-------|-------|
|        |  | AA      | AC    | CC    |
| AA     |  | 0.158   | 0.279 | 0.563 |
| AG     |  | 0.047   | 0.334 | 0.619 |
| GG     |  | 0.025   | 0.242 | 0.733 |

| EDN1.9 |    | EDN1.6 |  | EDN1.10 |       |       |
|--------|----|--------|--|---------|-------|-------|
|        |    |        |  | AA      | CC    | AC    |
| AA     | CT |        |  | 0.333   | 0.333 | 0.333 |
| AA     | TT |        |  | 0.157   | 0.686 | 0.157 |
| AA     | CC |        |  | 0.014   | 0.927 | 0.059 |
| AG     | CT |        |  | 0.006   | 0.78  | 0.214 |
| AG     | TT |        |  | 0.076   | 0.848 | 0.076 |
| AG     | CC |        |  | 0.017   | 0.698 | 0.285 |
| GG     | CT |        |  | 0.001   | 0.734 | 0.265 |
| GG     | TT |        |  | 0.009   | 0.95  | 0.041 |
| GG     | CC |        |  | 0.066   | 0.609 | 0.325 |

| ANXA2.8 |    | ANXA2.12 |  | ANXA2.13 |       |       |
|---------|----|----------|--|----------|-------|-------|
|         |    |          |  | AA       | AG    | GG    |
| GG      | GG |          |  | 0.333    | 0.333 | 0.333 |



|    |    |       |       |       |
|----|----|-------|-------|-------|
| GG | CC | 0.333 | 0.333 | 0.333 |
| GG | CG | 0.157 | 0.686 | 0.157 |
| AG | GG | 0.333 | 0.333 | 0.333 |
| AG | CC | 0.087 | 0.692 | 0.221 |
| AG | CG | 0.076 | 0.333 | 0.591 |
| AA | GG | 0.017 | 0.017 | 0.966 |
| AA | CC | 0.052 | 0.323 | 0.625 |
| AA | CG | 0.001 | 0.208 | 0.791 |

| STROKE | BMP6.10 | BMP6.11 |       |       |
|--------|---------|---------|-------|-------|
|        |         | CC      | TT    | CT    |
| 0 AA   |         | 0.775   | 0.077 | 0.148 |
| 0 AT   |         | 0.145   | 0.055 | 0.8   |
| 0 TT   |         | 0.081   | 0.528 | 0.391 |
| 1 AA   |         | 0.333   | 0.333 | 0.333 |
| 1 AT   |         | 0.333   | 0.333 | 0.333 |
| 1 TT   |         | 0.326   | 0.208 | 0.465 |

| ECE1.13 | ERG.3 |       |       |
|---------|-------|-------|-------|
|         | TT    | CT    | CC    |
| TT      | 0.195 | 0.092 | 0.713 |
| CT      | 0.231 | 0.447 | 0.322 |
| CC      | 0.282 | 0.473 | 0.246 |

| BMP6.2 | BMP6.3 |       |       |
|--------|--------|-------|-------|
|        | CC     | GG    | CG    |
| GG     | 0.872  | 0.029 | 0.099 |
| AA     | 0.23   | 0.381 | 0.389 |
| AG     | 0.32   | 0.057 | 0.623 |

| HBG           | HBF.P         | HBF.G         |               |               |               |
|---------------|---------------|---------------|---------------|---------------|---------------|
|               |               | [0.251 0.737) | [0.737 0.857) | [0.857 0.963) | [0.963 1.699] |
| [1.337 1.497) | [0.251 1.219) | 0.877         | 0.031         | 0.051         | 0.041         |
| [1.337 1.497) | [1.219 1.406) | 0.284         | 0.567         | 0.079         | 0.07          |
| [1.337 1.497) | [1.406 1.575) | 0.041         | 0.368         | 0.524         | 0.067         |
| [1.337 1.497) | [1.575 2.481] | 0.117         | 0.079         | 0.402         | 0.402         |
| [1.496 1.527) | [0.251 1.219) | 0.788         | 0.071         | 0.082         | 0.059         |
| [1.496 1.527) | [1.219 1.406) | 0.091         | 0.837         | 0.021         | 0.051         |
| [1.496 1.527) | [1.406 1.575) | 0.062         | 0.113         | 0.803         | 0.022         |
| [1.496 1.527) | [1.575 2.481] | 0.068         | 0.055         | 0.227         | 0.65          |
| [1.527 1.562) | [0.251 1.219) | 0.75          | 0.068         | 0.091         | 0.091         |
| [1.527 1.562) | [1.219 1.406) | 0.046         | 0.802         | 0.061         | 0.091         |
| [1.527 1.562) | [1.406 1.575) | 0.001         | 0.052         | 0.855         | 0.092         |
| [1.527 1.562) | [1.575 2.481] | 0.052         | 0.102         | 0.031         | 0.815         |
| [1.562 1.734] | [0.251 1.219) | 0.62          | 0.216         | 0.109         | 0.055         |
| [1.562 1.734] | [1.219 1.406) | 0.076         | 0.635         | 0.213         | 0.076         |
| [1.562 1.734] | [1.406 1.575) | 0.055         | 0.068         | 0.557         | 0.32          |
| [1.562 1.734] | [1.575 2.481] | 0.033         | 0.033         | 0.025         | 0.909         |

| STROKE | CAT | MET.5 |    |    |
|--------|-----|-------|----|----|
|        |     | TT    | CT | CC |

|      |       |       |       |
|------|-------|-------|-------|
| 0 AA | 0.103 | 0.333 | 0.564 |
| 0 AG | 0.005 | 0.157 | 0.838 |
| 0 GG | 0.005 | 0.075 | 0.92  |
| 1 AA | 0.333 | 0.333 | 0.333 |
| 1 AG | 0.061 | 0.061 | 0.878 |
| 1 GG | 0.005 | 0.017 | 0.978 |

| STROKE | ECE1.12 | ECE1.13 |       |       |
|--------|---------|---------|-------|-------|
|        |         | TT      | CT    | CC    |
| 0      | CC      | 0.654   | 0.293 | 0.053 |
| 0      | CT      | 0.008   | 0.68  | 0.312 |
| 0      | TT      | 0.001   | 0.065 | 0.934 |
| 1      | CC      | 0.083   | 0.458 | 0.458 |
| 1      | CT      | 0.083   | 0.271 | 0.646 |
| 1      | TT      | 0.005   | 0.134 | 0.861 |

| EDN1.3 | EDN1.9 |       |       |
|--------|--------|-------|-------|
|        | AA     | AG    | GG    |
| AA     | 0.724  | 0.065 | 0.211 |
| AC     | 0.03   | 0.719 | 0.251 |
| CC     | 0.007  | 0.129 | 0.864 |

| CAT | TIE   |       |       |
|-----|-------|-------|-------|
|     | AG    | AA    | GG    |
| AA  | 0.686 | 0.157 | 0.157 |
| AG  | 0.207 | 0.046 | 0.747 |
| GG  | 0.232 | 0.015 | 0.753 |

| EDN1.3 | ANXA2.12 |       |       |
|--------|----------|-------|-------|
|        | GG       | CC    | CG    |
| AA     | 0.138    | 0.431 | 0.431 |
| AC     | 0.035    | 0.679 | 0.286 |
| CC     | 0.008    | 0.77  | 0.222 |

| TGFBR2.6 | TGFBR2.0 |       |       |
|----------|----------|-------|-------|
|          | CT       | CC    | TT    |
| CT       | 0.645    | 0.063 | 0.292 |
| CC       | 0.104    | 0.755 | 0.141 |
| TT       | 0.176    | 0.023 | 0.801 |

| ERG.5 | RS276789 |       |       |
|-------|----------|-------|-------|
|       | TT       | CC    | CT    |
| CC    | 0.092    | 0.609 | 0.299 |
| AA    | 0.031    | 0.704 | 0.265 |
| AC    | 0.05     | 0.526 | 0.424 |

| BMP6 | STROKE | BMP6.10 |       |       |
|------|--------|---------|-------|-------|
|      |        | AA      | AT    | TT    |
| GG   | 0      | 0.262   | 0.69  | 0.048 |
| GG   | 1      | 0.333   | 0.333 | 0.333 |
| CG   | 0      | 0.027   | 0.318 | 0.655 |

|    |   |       |       |       |
|----|---|-------|-------|-------|
| CG | 1 | 0.039 | 0.039 | 0.922 |
| CC | 0 | 0.055 | 0.326 | 0.619 |
| CC | 1 | 0.005 | 0.005 | 0.99  |

| EDN1.3 | BMP6.2 |       |       |
|--------|--------|-------|-------|
|        | GG     | AA    | AG    |
| AA     | 0.211  | 0.211 | 0.578 |
| AC     | 0.26   | 0.277 | 0.463 |
| CC     | 0.154  | 0.36  | 0.485 |

| ERG.2 | ERG.4 |       |       |
|-------|-------|-------|-------|
|       | AC    | CC    | AA    |
| GG    | 0.298 | 0.618 | 0.084 |
| AG    | 0.433 | 0.507 | 0.06  |
| AA    | 0.505 | 0.405 | 0.09  |

| STROKE | HBF.P         |               |               |               |
|--------|---------------|---------------|---------------|---------------|
|        | [0.251 1.219) | [1.219 1.406) | [1.406 1.575) | [1.575 2.480] |
| 0      | 0.234         | 0.257         | 0.253         | 0.256         |
| 1      | 0.469         | 0.146         | 0.198         | 0.187         |

| HBG           | THALASSEMIA |          |
|---------------|-------------|----------|
|               | SS          | SS_ALPHA |
| [1.337 1.496) | 0.756       | 0.244    |
| [1.496 1.527) | 0.756       | 0.244    |
| [1.527 1.562) | 0.646       | 0.354    |
| [1.562 1.734] | 0.619       | 0.381    |

| ANXA2.8 | CAT   |       |       |
|---------|-------|-------|-------|
|         | AA    | AG    | GG    |
| GG      | 0.242 | 0.242 | 0.516 |
| AG      | 0.045 | 0.045 | 0.91  |
| AA      | 0.003 | 0.075 | 0.922 |

| ANXA2.8 | BMP6  |       |       |
|---------|-------|-------|-------|
|         | GG    | CG    | CC    |
| GG      | 0.242 | 0.242 | 0.516 |
| AG      | 0.045 | 0.198 | 0.757 |
| AA      | 0.006 | 0.097 | 0.897 |

| ANXA2.8 | ERG.5 |       |       |
|---------|-------|-------|-------|
|         | CC    | AA    | AC    |
| GG      | 0.242 | 0.516 | 0.242 |
| AG      | 0.045 | 0.91  | 0.045 |
| AA      | 0.006 | 0.881 | 0.113 |

| ANXA2.8 | STROKE | ECE1.12 |       |       |
|---------|--------|---------|-------|-------|
|         |        | CC      | CT    | TT    |
| GG      | 0      | 0.19    | 0.62  | 0.19  |
| GG      | 1      | 0.333   | 0.333 | 0.333 |
| AG      | 0      | 0.079   | 0.242 | 0.679 |

|    |   |       |       |       |
|----|---|-------|-------|-------|
| AG | 1 | 0.333 | 0.333 | 0.333 |
| AA | 0 | 0.005 | 0.128 | 0.867 |
| AA | 1 | 0.048 | 0.048 | 0.904 |

| ANXA2.8 | EDN1.3 |       |       |
|---------|--------|-------|-------|
|         | AA     | AC    | CC    |
| GG      | 0.242  | 0.242 | 0.516 |
| AG      | 0.045  | 0.299 | 0.656 |
| AA      | 0.009  | 0.159 | 0.832 |

| ANXA2.8 | TGFBR2.6 |       |       |
|---------|----------|-------|-------|
|         | CT       | CC    | TT    |
| GG      | 0.516    | 0.242 | 0.242 |
| AG      | 0.096    | 0.096 | 0.808 |
| AA      | 0.19     | 0.018 | 0.792 |

| STROKE | ANXA2.8 | ADCY9.8 |       |       |
|--------|---------|---------|-------|-------|
|        |         | AA      | GG    | AG    |
|        | 0 GG    | 0.19    | 0.62  | 0.19  |
|        | 0 AG    | 0.734   | 0.024 | 0.242 |
|        | 0 AA    | 0.769   | 0.009 | 0.222 |
|        | 1 GG    | 0.333   | 0.333 | 0.333 |
|        | 1 AG    | 0.333   | 0.333 | 0.333 |
|        | 1 AA    | 0.894   | 0.005 | 0.101 |

| ANXA2.8 | EDN1.6 |       |       |
|---------|--------|-------|-------|
|         | CT     | TT    | CC    |
| GG      | 0.333  | 0.333 | 0.333 |
| AG      | 0.333  | 0.333 | 0.333 |
| AA      | 0.333  | 0.333 | 0.333 |

| STROKE | ADCY9.5 |       |       |
|--------|---------|-------|-------|
|        | GG      | AG    | AA    |
| 0      | 0.034   | 0.212 | 0.754 |
| 1      | 0.014   | 0.431 | 0.555 |

| ANXA2.8 | TGFBR3.4 |       |       |
|---------|----------|-------|-------|
|         | GG       | AA    | AG    |
| GG      | 0.242    | 0.242 | 0.516 |
| AG      | 0.198    | 0.655 | 0.147 |
| AA      | 0.029    | 0.659 | 0.312 |

| STROKE | ADCY9.11 |       |       |
|--------|----------|-------|-------|
|        | CT       | CC    | TT    |
| 0      | 0.334    | 0.593 | 0.073 |
| 1      | 0.17     | 0.67  | 0.16  |

| STROKE | ERG.2 |       |       |
|--------|-------|-------|-------|
|        | GG    | AG    | AA    |
| 0      | 0.064 | 0.403 | 0.533 |
| 1      | 0.108 | 0.212 | 0.68  |

| STROKE | ADCY9 |       |       |
|--------|-------|-------|-------|
|        | CC    | TT    | CT    |
| 0      | 0.218 | 0.272 | 0.51  |
| 1      | 0.097 | 0.347 | 0.556 |

| STROKE | TEK   |       |       |
|--------|-------|-------|-------|
|        | CG    | GG    | CC    |
| 0      | 0.409 | 0.091 | 0.5   |
| 1      | 0.472 | 0.024 | 0.504 |

| STROKE | ADCY9.9 |       |       |
|--------|---------|-------|-------|
|        | AA      | AC    | CC    |
| 0      | 0.227   | 0.478 | 0.295 |
| 1      | 0.285   | 0.295 | 0.42  |

| STROKE | TGFBR3.6 |       |       |
|--------|----------|-------|-------|
|        | CC       | AA    | AC    |
| 0      | 0.369    | 0.164 | 0.467 |
| 1      | 0.545    | 0.014 | 0.441 |

| STROKE | CCL2  |       |       |
|--------|-------|-------|-------|
|        | TT    | CC    | CT    |
| 0      | 0.096 | 0.468 | 0.436 |
| 1      | 0.014 | 0.66  | 0.326 |

| STROKE | ANXA2.6 |       |       |
|--------|---------|-------|-------|
|        | GG      | AG    | AA    |
| 0      | 0.11    | 0.431 | 0.459 |
| 1      | 0.316   | 0.149 | 0.535 |

| HBG           |               |               |               |
|---------------|---------------|---------------|---------------|
| [1.337 1.496) | [1.496 1.527) | [1.527 1.562) | [1.562 1.734] |
| 0.236         | 0.257         | 0.253         | 0.254         |

| ANXA2.8 |       |       |  |
|---------|-------|-------|--|
| GG      | AG    | AA    |  |
| 0.003   | 0.014 | 0.983 |  |
