# Supplementary material
Source: PubMed Central journal article supplement (PMC2896308)
Supplement: NIHMS210629-supplement-Supplement_Table_3.pdf [file NIHMS210629-supplement-Supplement_Table_3.pdf]

**Supplementary Table 3:** Summary statistics of the logistic regression model. Estimates, standard errors and p-values of the genotype effects that were found significantly associated with the stroke using logistic regression. HbF.G describes the effect of fetal hemoglobin (g/dL). The p-values were computed using asymptotic normal theory. Box plots of the predictive probabilities is shown in Supplementary Figure 1.

| Effect       | Estimate | St. Error | P-value  |
|--------------|----------|-----------|----------|
| Intercept    | 3.56     | 0.94      | 0.0002   |
| HbF.G        | -4.6     | 1.03      | < 0.0000 |
| SELP.12 (TT) | 2.41     | 0.76      | 0.0006   |
| SELP.14 (CT) | 1.98     | 0.39      | < 0.0000 |
| SELP.14 (TT) | 7        | 1.1       | < 0.0000 |
| BMP6.11 (CT) | -0.83    | 0.41      | 0.0436   |
| BMP6.11 (TT) | -1.87    | 0.49      | 0.0001   |
| BMP6.12 (CT) | -4.18    | 0.82      | < 0.0000 |
| BMP6.13 (CT) | -4.6     | 0.82      | < 0.0000 |
| BMP6.13 (TT) | -3.06    | 0.5       | < 0.0000 |
