# Supplementary material
Source: PubMed Central journal article supplement (PMC2896308)
Supplement: NIHMS210629-supplement-Supplement_Table_4.pdf [file NIHMS210629-supplement-Supplement_Table_4.pdf]

**Supplementary Table 4:** Correspondence table between SNP names in the network in Figure 2 and their RS number. SNPs in the network are named with the name of their gene plus a progressive index number, if necessary. Color blocks group SNPs on the same gene. The last column reports the chromosome where the gene is located.

| Name     | RS Number   | Chromosome |
|----------|-------------|------------|
| ADCY9    | rs437115    | 16         |
| ADCY9.11 | rs2238432   |            |
| ADCY9.5  | rs2238426   |            |
| ADCY9.8  | rs2072338   |            |
| ADCY9.9  | rs2283497   |            |
| ANXA2.11 | rs7163836   | 15         |
| ANXA2.12 | rs1027899   |            |
| ANXA2.13 | hCV9036132  |            |
| ANXA2.3  | hCV1571628  |            |
| ANXA2.4  | rs8041032   |            |
| ANXA2.5  | rs931967    |            |
| ANXA2.6  | hCV26910500 |            |
| ANXA2.7  | rs1033028   |            |
| ANXA2.8  | hCV16131594 |            |
| BMP6     | rs199205    | 6          |
| BMP6.10  | rs267196    |            |
| BMP6.11  | rs267201    |            |
| BMP6.12  | rs408505    |            |
| BMP6.13  | rs449853    |            |
| BMP6.14  | rs1225934   |            |
| BMP6.2   | rs270387    |            |
| BMP6.3   | rs270393    |            |
| BMP6.9   | rs267192    |            |
| CAT      | rs1001179   | 11         |
| CCL2     | rs4586      | 17         |
| CIQB     | rs291988    | 1          |
| CSF2.3   | rs25881     | 5          |
| CSF2.4   | rs25882     |            |
| ECE1.12  | rs212528    | 1          |
| ECE1.13  | rs212531    |            |
| EDN1.10  | rs5370      |            |
| EDN1.3   | rs2070699   |            |
| EDN1.6   | rs5369      |            |
| EDN1.7   | hCV3107155  |            |
| EDN1.9   | rs1630736   |            |
| ERG.2    | rs989554    | 21         |
| ERG.3    | rs2836354   |            |
| ERG.4    | rs2252210   |            |
| ERG.5    | rs2836430   |            |

|           |           |    |
|-----------|-----------|----|
| KL.2      | rs560014  | 13 |
| KL.3      | rs650439  |    |
| MET.5     | rs38850   | 7  |
| MET.6     | rs38859   |    |
| MET.9     | rs42383   |    |
| NRCAM     | rs401433  | 7  |
| rs276789  | rs276789  | 16 |
| SELP      | rs6128    | 1  |
| SELP.11   | rs3917803 |    |
| SELP.12   | rs2420378 |    |
| SELP.13   | rs3917771 |    |
| SELP.14   | rs3917733 |    |
| SELP.15   | rs6131    |    |
| SELP.17   | rs3917691 |    |
| SELP.2    | rs6135    |    |
| SELP.22   | rs3753306 |    |
| SELPLG    | rs765267  | 12 |
| TEK       | rs489347  | 9  |
| TGFBR2    | rs1019856 |    |
| TGFBR2.0  | rs876687  |    |
| TGFBR2.6  | rs3773658 |    |
| TGFBR3    | rs1555889 | 1  |
| TGFBR3.10 | rs284875  |    |
| TGFBR3.2  | rs2038931 |    |
| TGFBR3.4  | rs901917  |    |
| TGFBR3.6  | rs2148322 |    |
| TGFBR3.7  | rs2765888 |    |
| TGFBR3.8  | rs2007686 |    |
| TGFBR3.9  | rs284874  |    |
| TIE       | rs1556581 | 1  |
