# Supplementary material
Source: PubMed Central journal article supplement (PMC2896308)
Supplement: NIHMS210629-supplement-Supplement_Table_5.pdf [file NIHMS210629-supplement-Supplement_Table_5.pdf]

**Supplementary Table 5:** Results of the predictive validation. Observed values, prediction and posterior probability of stroke for each patient with (1) and without (0) stroke in the independent set of 114 subjects. These data are plotted in the box plots shown in Figure 3.

| Case | Observed | Predicted | Probability |
|------|----------|-----------|-------------|
| 111  | 1        | 1         | 0.999       |
| 114  | 1        | 1         | 0.999       |
| 112  | 1        | 1         | 0.998       |
| 113  | 1        | 1         | 0.997       |
| 110  | 1        | 1         | 0.95        |
| 108  | 1        | 1         | 0.787       |
| 109  | 1        | 1         | 0.612       |
| 27   | 0        | 1         | 0.95        |
| 92   | 0        | 1         | 0.721       |
| 53   | 0        | 0         | 0.411       |
| 103  | 0        | 0         | 0.231       |
| 58   | 0        | 0         | 0.115       |
| 87   | 0        | 0         | 0.1         |
| 5    | 0        | 0         | 0.081       |
| 82   | 0        | 0         | 0.058       |
| 15   | 0        | 0         | 0.057       |
| 99   | 0        | 0         | 0.056       |
| 72   | 0        | 0         | 0.046       |
| 83   | 0        | 0         | 0.046       |
| 74   | 0        | 0         | 0.033       |
| 3    | 0        | 0         | 0.031       |
| 48   | 0        | 0         | 0.026       |
| 4    | 0        | 0         | 0.022       |
| 21   | 0        | 0         | 0.022       |
| 55   | 0        | 0         | 0.018       |
| 62   | 0        | 0         | 0.013       |
| 73   | 0        | 0         | 0.013       |
| 32   | 0        | 0         | 0.012       |
| 93   | 0        | 0         | 0.011       |
| 6    | 0        | 0         | 0.011       |
| 97   | 0        | 0         | 0.01        |
| 16   | 0        | 0         | 0.009       |
| 71   | 0        | 0         | 0.009       |
| 100  | 0        | 0         | 0.008       |
| 85   | 0        | 0         | 0.007       |
| 59   | 0        | 0         | 0.006       |
| 78   | 0        | 0         | 0.006       |
| 36   | 0        | 0         | 0.004       |
| 50   | 0        | 0         | 0.004       |
| 18   | 0        | 0         | 0.003       |
| 31   | 0        | 0         | 0.003       |
| 76   | 0        | 0         | 0.003       |

|     |   |   |       |
|-----|---|---|-------|
| 88  | 0 | 0 | 0.003 |
| 101 | 0 | 0 | 0.003 |
| 14  | 0 | 0 | 0.002 |
| 28  | 0 | 0 | 0.002 |
| 33  | 0 | 0 | 0.002 |
| 34  | 0 | 0 | 0.002 |
| 45  | 0 | 0 | 0.002 |
| 1   | 0 | 0 | 0.001 |
| 19  | 0 | 0 | 0.001 |
| 35  | 0 | 0 | 0.001 |
| 57  | 0 | 0 | 0.001 |
| 75  | 0 | 0 | 0.001 |
| 84  | 0 | 0 | 0.001 |
| 94  | 0 | 0 | 0.001 |
| 107 | 0 | 0 | 0.001 |
| 2   | 0 | 0 | 0     |
| 7   | 0 | 0 | 0     |
| 8   | 0 | 0 | 0     |
| 9   | 0 | 0 | 0     |
| 10  | 0 | 0 | 0     |
| 11  | 0 | 0 | 0     |
| 12  | 0 | 0 | 0     |
| 13  | 0 | 0 | 0     |
| 17  | 0 | 0 | 0     |
| 20  | 0 | 0 | 0     |
| 22  | 0 | 0 | 0     |
| 23  | 0 | 0 | 0     |
| 24  | 0 | 0 | 0     |
| 25  | 0 | 0 | 0     |
| 26  | 0 | 0 | 0     |
| 29  | 0 | 0 | 0     |
| 30  | 0 | 0 | 0     |
| 37  | 0 | 0 | 0     |
| 38  | 0 | 0 | 0     |
| 39  | 0 | 0 | 0     |
| 40  | 0 | 0 | 0     |
| 41  | 0 | 0 | 0     |
| 42  | 0 | 0 | 0     |
| 43  | 0 | 0 | 0     |
| 44  | 0 | 0 | 0     |
| 46  | 0 | 0 | 0     |
| 47  | 0 | 0 | 0     |
| 49  | 0 | 0 | 0     |
| 51  | 0 | 0 | 0     |
| 52  | 0 | 0 | 0     |
| 54  | 0 | 0 | 0     |
| 56  | 0 | 0 | 0     |
| 60  | 0 | 0 | 0     |
| 61  | 0 | 0 | 0     |
| 63  | 0 | 0 | 0     |
| 64  | 0 | 0 | 0     |

|     |   |   |   |
|-----|---|---|---|
| 65  | 0 | 0 | 0 |
| 66  | 0 | 0 | 0 |
| 67  | 0 | 0 | 0 |
| 68  | 0 | 0 | 0 |
| 69  | 0 | 0 | 0 |
| 70  | 0 | 0 | 0 |
| 77  | 0 | 0 | 0 |
| 79  | 0 | 0 | 0 |
| 80  | 0 | 0 | 0 |
| 81  | 0 | 0 | 0 |
| 86  | 0 | 0 | 0 |
| 89  | 0 | 0 | 0 |
| 90  | 0 | 0 | 0 |
| 91  | 0 | 0 | 0 |
| 95  | 0 | 0 | 0 |
| 96  | 0 | 0 | 0 |
| 98  | 0 | 0 | 0 |
| 102 | 0 | 0 | 0 |
| 104 | 0 | 0 | 0 |
| 105 | 0 | 0 | 0 |
| 106 | 0 | 0 | 0 |

---
